# Supplementary material for: The Effect of Prophylactic HPV Vaccines on Oral and Oropharyngeal HPV Infection—A Systematic Review
Source: MDPI journal article supplement (doi:10.3390/v13071339), 2021-07-11
Supplement: s1 [file s1]

Table S3. Quality Assessment of Case-Control Studies

| Study             | Was the research question or objective in this paper clearly stated and appropriate? | Was the study population clearly specified and defined? | Did the authors include a sample size justification? | Were controls selected or recruited from the same or similar population that gave rise to the cases (including the same timeframe)? | Were the definitions, inclusion and exclusion criteria, algorithms or processes used to identify or select cases and controls valid, reliable, and implemented consistently across all study participants? | Were the cases clearly defined and differentiated from controls? | If less than 100 percent of eligible cases and/or controls were selected for the study, were the cases and/or controls randomly selected from those eligible? | Was there use of concurrent controls? | Were the investigators able to confirm that the exposure/risk occurred prior to the development of the condition or event that defined a participant as a case? | Were the measures of exposure/risk clearly defined, valid, reliable, and implemented consistently (including the same time period) across all study participants? | Were the assessors of exposure/risk blinded to the case or control status of participants? | Were key potential confounding variables measured and adjusted statistically in the analyses? If matching was used, did the investigators account for matching during study analysis? | Overall score |
|-------------------|--------------------------------------------------------------------------------------|---------------------------------------------------------|------------------------------------------------------|-------------------------------------------------------------------------------------------------------------------------------------|------------------------------------------------------------------------------------------------------------------------------------------------------------------------------------------------------------|------------------------------------------------------------------|---------------------------------------------------------------------------------------------------------------------------------------------------------------|---------------------------------------|-----------------------------------------------------------------------------------------------------------------------------------------------------------------|-------------------------------------------------------------------------------------------------------------------------------------------------------------------|--------------------------------------------------------------------------------------------|---------------------------------------------------------------------------------------------------------------------------------------------------------------------------------------|---------------|
| Pinto et al.      | Yes                                                                                  | Yes                                                     | No                                                   | Yes                                                                                                                                 | No                                                                                                                                                                                                         | No                                                               | No                                                                                                                                                            | No                                    | Yes                                                                                                                                                             | Yes                                                                                                                                                               | No                                                                                         | Yes                                                                                                                                                                                   | 6/12          |
| Handisurya et al. | Yes                                                                                  | Yes                                                     | No                                                   | Yes                                                                                                                                 | No                                                                                                                                                                                                         | Yes                                                              | Na*                                                                                                                                                           | No                                    | Yes                                                                                                                                                             | Yes                                                                                                                                                               | No                                                                                         | Yes                                                                                                                                                                                   | 7/12          |
